# Supplementary material
Source: MDPI journal article supplement (https://www.mdpi.com/2077-0472/10/7/281)
Supplement: s1 [file s1]

**Table S1.** Overview of interviews.

| No. of Interviews | Region            | Interviewees                             | Interview type                                                                              | Translated by                 | Dates                    |
|-------------------|-------------------|------------------------------------------|---------------------------------------------------------------------------------------------|-------------------------------|--------------------------|
| 3                 | Bakanas village   | Regional administrators                  | Informative conversation; official statistics on livestock, farms, and households, pastures | Khalil, Iklassov, Baibagyssov | 24/07, 29/07, 10/08/2015 |
| 7                 | Karoy district    | Farmer                                   | Semi-structured                                                                             | Khalil, Iklassov              | 24–26/07/2015            |
| 1                 | Karoy village     | Local veterinarian                       | Semi-structured and expert                                                                  | Khalil, Iklassov              | 25/07/2015               |
| 1                 | Koktal village    | Local administrator                      | Informative conversation                                                                    | Khalil, Iklassov              | 28/07/2015               |
| 9                 | Koktal district   | Farmers                                  | Semi-structured                                                                             | Khalil, Iklassov              | 27–28/07/2015            |
| 1                 | Koktal district   | Local veterinarian                       | Semi-structured and expert                                                                  | Khalil, Iklassov              | 30/07/2015               |
| 1                 | Akkol village     | Local administrator                      | Informative conversation                                                                    | Iklassov                      | 30/07/2015               |
| 1                 | Akkol district    | Local veterinarian                       | Semi-structured and expert                                                                  | Khalil, Iklassov              | 30/07/2015               |
| 6                 | Akkol district    | Farmers                                  | Semi-structured                                                                             | Khalil, Iklassov              | 30–31/07/2015            |
| 1                 | Zhideli village   | Local administrator                      | Informative conversation                                                                    | Khalil, Baibagyssov           | 11/08/2015               |
| 1                 | Zhideli village   | Local veterinarian                       | Expert                                                                                      | Baibagyssov                   | 13/08/2015               |
| 11                | Zhideli district  | Farmers                                  | Semi-structured                                                                             | Khalil, Baibagyssov           | 12–22/08/2015            |
| 1                 | Akdala district   | Otes Bio Asia (cattle fattening station) | Expert elite bull program                                                                   | Khalil, Iklassov              | 02/08/2015               |
| 1                 | Balatopar village | Local administrator                      | Informative conversation                                                                    | Baibagyssov                   | 22/08/2015               |
| 1                 | Balatopar village | Hay trader                               | Informative conversation; local hay prices                                                  | Baibagyssov                   | 22/08/2015               |
