# Supplementary material
Source: MDPI journal article supplement (https://www.mdpi.com/2077-0472/10/7/281)
Supplement: s1 [file s1]

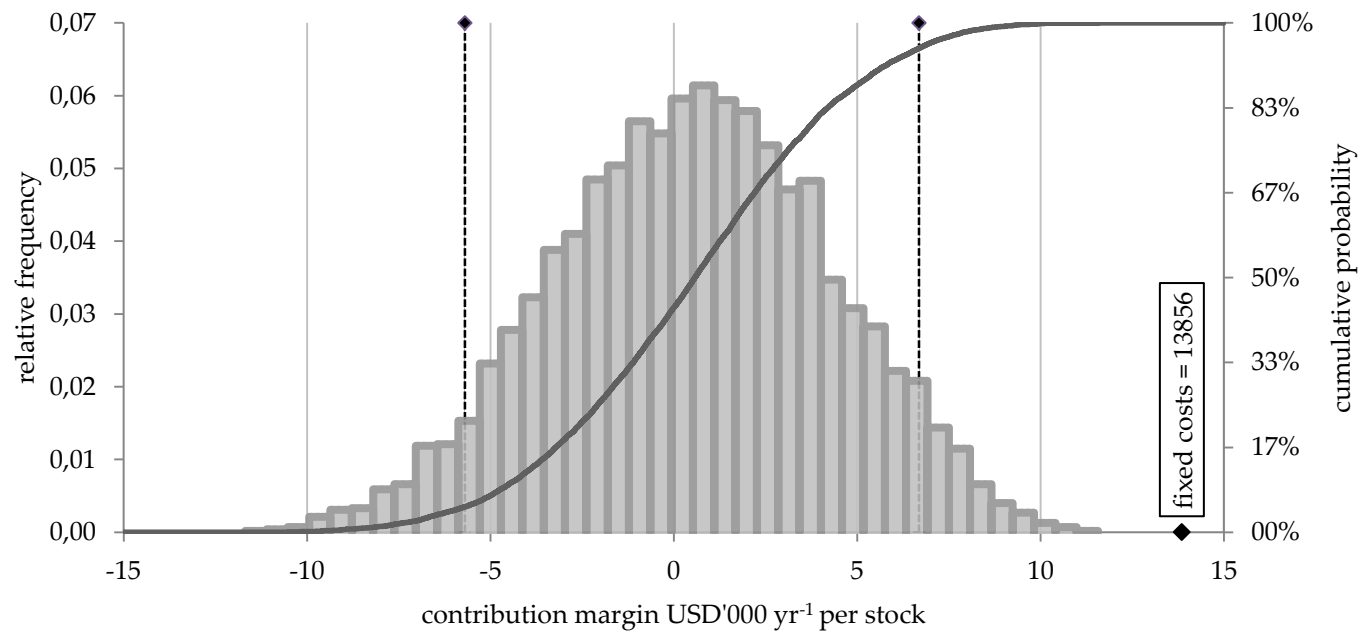

**Figure S4.** Relative frequency (histogram) and cumulative probability (curve) of contribution margin based on Monte Carlo simulation with 10,000 iterations for large-scale individual farm excluding government program payments and costs for elite bulls in worst case scenario. Vertical dashed line indicates contribution margin of zero and a risk of 44.3% that revenues cannot cover variable costs. Rhombuses (◆) mark total fixed costs.
