# Supplementary material
Source: MDPI journal article supplement (https://www.mdpi.com/2077-0472/10/7/281)
Supplement: s1 [file s1]

**Table S2.** Allocation of interviewed farms to the three types of individual farms by village districts.

| <b>Village district</b> | <b>Small-scale</b> | <b>Medium-scale</b> | <b>Large-scale</b> |
|-------------------------|--------------------|---------------------|--------------------|
| Karoy                   | 5                  | 3                   | –                  |
| Koktal                  | 4                  | 5                   | –                  |
| Akkol                   | 3                  | 2                   | 2                  |
| Zhideli                 | 4                  | 4                   | 3                  |
| <b>Sum</b>              | <b>16</b>          | <b>14</b>           | <b>5</b>           |
