# Supplementary material
Source: MDPI journal article supplement (https://www.mdpi.com/2077-0472/10/7/281)
Supplement: s1 [file s1]

**Table S6.** Contribution margin analysis and net farm incomes from operations, large-scale individual farm.

| Large-scale farm                                        |                                            |                                              |                                                         |                                                             |                             |
|---------------------------------------------------------|--------------------------------------------|----------------------------------------------|---------------------------------------------------------|-------------------------------------------------------------|-----------------------------|
| <b>Revenues</b>                                         |                                            |                                              |                                                         |                                                             |                             |
| <i>Cash revenue</i>                                     | <b>Number of traded livestock (head)</b>   | <b>Weight of meat (kg head<sup>-1</sup>)</b> | <b>Selling price (USD kg<sup>-1</sup>)</b>              | <b>Sum (USD yr<sup>-1</sup>)</b>                            | share of total revenues (%) |
| Sale of beef (two-year-old bulls)                       | 16                                         | 170                                          | 4,4                                                     | 11.968                                                      | 31                          |
| Sale of beef (one-year-old bulls)                       | 18                                         | 130                                          | 4,4                                                     | 10.296                                                      |                             |
| <b>Sum of cash revenues</b>                             |                                            |                                              |                                                         | <b>22.264</b>                                               |                             |
| <i>Inventory changes</i>                                | <b>Herd size at end of the year (head)</b> | <b>Additional calves (head)</b>              | <b>Selling price (USD kg<sup>-1</sup>)</b>              | <b>Selling price (USD head<sup>-1</sup>)</b>                | share of total revenues (%) |
| Cow calves                                              | 170                                        | 34                                           |                                                         | 502                                                         | 37                          |
| Bull calves                                             | 170                                        | 16                                           | 4,4                                                     |                                                             |                             |
| <b>Sum of inventory changes</b>                         |                                            |                                              |                                                         | <b>26.220</b>                                               |                             |
| <i>Government program payments (elite bull program)</i> | <b>Number of cows (head)</b>               | <b>Annual payment (USD per cow)</b>          | <b>Amount of traded elite beef (kg yr<sup>-1</sup>)</b> | <b>Premium payment for elite beef (USD kg<sup>-1</sup>)</b> | share of total revenues (%) |
| Support for cows                                        | 120                                        | 95                                           |                                                         |                                                             | 8.096                       |
| Traded elite beef                                       |                                            |                                              | 5.060                                                   | 1,6                                                         |                             |

|                                            | Number of elite bulls<br>(head per stock) | Weight of<br>meat (kg<br>head <sup>-1</sup> ) | Selling price<br>(USD kg <sup>-1</sup> )              | Premium<br>payment for<br>elite beef<br>(USD kg <sup>-1</sup> ) |                                |         |         |
|--------------------------------------------|-------------------------------------------|-----------------------------------------------|-------------------------------------------------------|-----------------------------------------------------------------|--------------------------------|---------|---------|
| Beef of elite bulls                        | 4                                         | 300                                           | 4,4                                                   | 1,6                                                             | 3.600                          |         |         |
|                                            |                                           | Sum of government program payments            |                                                       |                                                                 | 23.096                         | 32      |         |
|                                            |                                           |                                               | Total revenues                                        |                                                                 |                                | 71.580  | 100     |
| Variable costs independent of water inflow |                                           |                                               |                                                       |                                                                 |                                |         |         |
| <i>Veterinary</i>                          | Ear tags per head                         | Number of<br>reared<br>livestock<br>(head)    | Total number<br>of ear tags<br>(piece)                | Price per ear<br>tag (USD)                                      | Sum<br>(USD yr <sup>-1</sup> ) |         |         |
| Calves                                     | 2                                         | 68                                            | 136                                                   | 0,8                                                             | 109                            | 0,47397 |         |
| <i>Transport for beef trading</i>          | Trips per year                            | Average<br>diesel<br>consumption<br>(L)       | Annual diesel<br>consumption<br>(L yr <sup>-1</sup> ) | Diesel price<br>(USD L <sup>-1</sup> )                          |                                |         |         |
|                                            | 3                                         | 300                                           | 900                                                   | 0,5                                                             | 450                            | 2       |         |
| <i>Kombi corn</i>                          | Amount<br>(kg d <sup>-1</sup> per head)   | Livestock<br>number<br>(head)                 | Feeding<br>period<br>(d)                              | Purchase<br>price (USD<br>kg <sup>-1</sup> )                    |                                |         |         |
| Cows                                       | 1                                         | 120                                           | 135                                                   | 0,2                                                             | 3.240                          |         |         |
| Workhorses                                 | 1                                         | 2                                             | 365                                                   | 0,2                                                             | 146                            |         |         |
|                                            |                                           |                                               | Sum of costs for kombi corn                           |                                                                 |                                | 3.386   | 14,7505 |

| <i>Annual purchase of elite bulls</i>                    | Number of elite bulls<br>(heads per stock)     | Purchase<br>price (USD<br>yr <sup>-1</sup> per bull) |                                                               |                                                               |                                           |
|----------------------------------------------------------|------------------------------------------------|------------------------------------------------------|---------------------------------------------------------------|---------------------------------------------------------------|-------------------------------------------|
| Elite bulls                                              | 4                                              | 924                                                  |                                                               | 3.696                                                         | 16,1009                                   |
| <b>Sum of variable costs independent of water inflow</b> |                                                |                                                      |                                                               | <b>7.641</b>                                                  | <b>33,2857</b>                            |
| <b>Variable costs depending on water inflow</b>          |                                                |                                                      |                                                               |                                                               |                                           |
| <i>Demand winter fodder (hay)</i>                        | Amount of hay<br>(kg d <sup>-1</sup> per head) | Livestock<br>number<br>(head)                        | Feeding<br>period<br>(d)                                      | Annual<br>amount<br>(kg yr <sup>-1</sup> )                    | Total<br>demand<br>(kg yr <sup>-1</sup> ) |
| Cattle                                                   | 20                                             | 140                                                  | 135                                                           | 378.000                                                       | 382.860                                   |
| Workhorses                                               | 18                                             | 2                                                    | 135                                                           | 4.860                                                         |                                           |
| <i>Feed costs (hay for winter period)</i>                | Specification                                  | Total<br>demand<br>(kg yr <sup>-1</sup> )            | Production or<br>purchase<br>price<br>(USD kg <sup>-1</sup> ) | Production<br>or purchase<br>costs<br>(USD yr <sup>-1</sup> ) | Sum<br>(USD yr <sup>-1</sup> )            |
| Normal situation                                         | Farm own production<br>of reed hay             | 382.860                                              | 0,04                                                          | 15.314                                                        | <b>15.314</b>                             |
| Decreasing water inflow                                  | Farm own production<br>of reed hay             | 191.430                                              | 0,04                                                          | 7.657                                                         | <b>26.800</b>                             |
|                                                          | Purchase of lucerne<br>hay                     | 191.430                                              | 0,10                                                          | 19.143                                                        |                                           |
| Worst case                                               | Purchase of reed hay                           | 191.430                                              | 0,08                                                          | 15.314                                                        | <b>42.115</b>                             |
|                                                          | Purchase of lucerne<br>hay                     | 191.430                                              | 0,14                                                          | 26.800                                                        |                                           |
| <b>Total variable costs, normal situation</b>            |                                                |                                                      |                                                               |                                                               | <b>22.955</b>                             |
| <b>Total variable costs, decreasing water inflow</b>     |                                                |                                                      |                                                               |                                                               | <b>34.441</b>                             |
| <b>Total variable costs, worst case</b>                  |                                                |                                                      |                                                               |                                                               | <b>49.755</b>                             |

| Contribution margin (USD yr <sup>-1</sup> per stock) |                      |                                       |                     |                                             |     |
|------------------------------------------------------|----------------------|---------------------------------------|---------------------|---------------------------------------------|-----|
|                                                      |                      | Normal situation                      | 48.625              |                                             |     |
|                                                      |                      | Decreasing water inflow               | 37.139              | 23,6213                                     |     |
|                                                      |                      | Worst case                            | 21.825              | 55,1163                                     |     |
| Contribution margin ratio (%)                        |                      |                                       |                     |                                             |     |
|                                                      |                      | Normal situation                      | 68                  |                                             |     |
|                                                      |                      | Decreasing water inflow               | 52                  |                                             |     |
|                                                      |                      | Worst case                            | 30                  |                                             |     |
| Fixed costs                                          |                      |                                       |                     |                                             |     |
| Labor                                                | Number of employees  | Monthly salary (USD)                  | Months per year     | Sum (USD yr <sup>-1</sup> )                 |     |
| Permanent employed cowboys                           | 2                    | 317                                   | 12                  | 7608                                        |     |
| Land                                                 | Total area (ha)      | Leasing price (USD yr <sup>-1</sup> ) |                     |                                             |     |
|                                                      | 917                  | 0,29                                  |                     | 266                                         |     |
| Farm buildings                                       | Material costs (USD) | Useful life (years)                   | Salvage value (USD) | Annual depreciation (USD yr <sup>-1</sup> ) |     |
| Stone stable including feed storage                  | 2244                 | 49                                    | 0                   | 46                                          | 46  |
| House for employees                                  | 2112                 | 49                                    | 0                   | 43                                          | 43  |
| Pasture fence                                        | 1056                 | 5                                     | 0                   | 211                                         | 211 |
| Sum of building costs                                |                      |                                       |                     |                                             | 300 |
