# Supplementary material
Source: MDPI journal article supplement (https://www.mdpi.com/2077-0472/10/7/281)
Supplement: s1 [file s1]

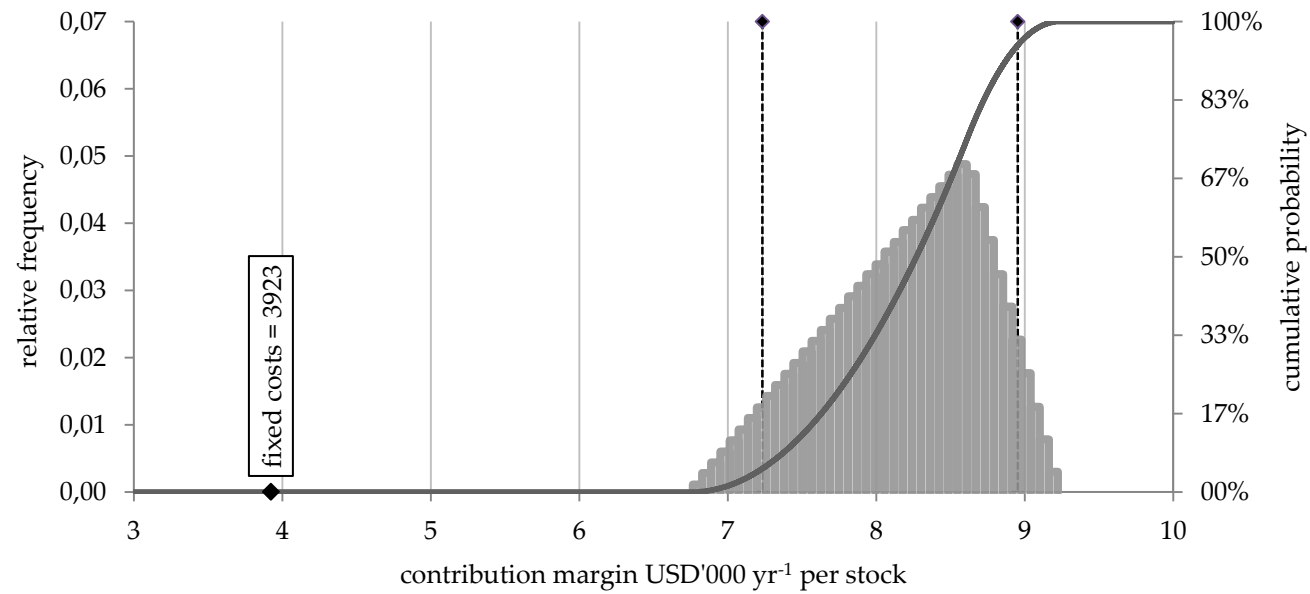

**Figure S2.** Relative frequency (histogram) and cumulative probability (curve) of contribution margin based on Monte Carlo simulation with 10,000 iterations for medium-scale individual farm in decreasing water inflow scenario. Vertical dashed lines indicate 90% of relative frequency. Rhombuses (♦) mark total fixed costs.
