# Supplementary material
Source: MDPI journal article supplement (https://www.mdpi.com/2077-0472/10/7/281)
Supplement: s1 [file s1]

**Table S5.** Contribution margin analysis and net farm incomes from operations, medium-scale individual farm.

| Medium-scale farm               |                                                       |                                         |                                       |                                         |                             |                             |
|---------------------------------|-------------------------------------------------------|-----------------------------------------|---------------------------------------|-----------------------------------------|-----------------------------|-----------------------------|
| <b>Revenues</b>                 |                                                       |                                         |                                       |                                         |                             |                             |
| <i>Cash revenue</i>             | Number of traded livestock (head)                     | Weight of meat (kg head <sup>-1</sup> ) | Selling price (USD kg <sup>-1</sup> ) | Selling price (USD head <sup>-1</sup> ) | Sum (USD yr <sup>-1</sup> ) |                             |
| Sale of beef                    | 7                                                     | 159                                     | 4,4                                   |                                         | 4.897                       | share of total              |
| Sale of goat (head)             | 17                                                    |                                         |                                       | 92,4                                    | 1.571                       | revenues                    |
| Sale of sheep (head)            | 20                                                    |                                         |                                       | 158,4                                   | 3.168                       | (%)                         |
|                                 |                                                       |                                         |                                       | <b>Sum of cash revenues</b>             | <b>9.636</b>                | 57,3                        |
| <i>Value of own consumption</i> | Number of consumed livestock (head yr <sup>-1</sup> ) | Weight of meat (kg head <sup>-1</sup> ) | Selling price (USD kg <sup>-1</sup> ) | Selling price (USD head <sup>-1</sup> ) |                             |                             |
| Consumption of beef             | 3                                                     | 165                                     | 5,1                                   |                                         | 2.525                       | share of total              |
| Consumption of goat meat        | 15                                                    |                                         |                                       | 92,4                                    | 1.386                       | revenues                    |
| Consumption of sheep meat       | 8                                                     |                                         |                                       | 158,4                                   | 1.267                       | (%)                         |
|                                 |                                                       |                                         |                                       | <b>Sum of value of own consumption</b>  | <b>5.178</b>                | 30,8                        |
| <i>Inventory changes</i>        | Herd size at end of the year (head)                   | Additional cow calves (head)            |                                       | Selling price (USD head <sup>-1</sup> ) |                             | share of total revenues (%) |
| Cattle                          | 61                                                    | 4                                       |                                       | 502                                     | 2.008                       | 11,9                        |
|                                 |                                                       |                                         |                                       | <b>Total revenues</b>                   | <b>16.822</b>               | 100                         |

| Variable costs independent of water inflow        |                                                |                                         |                                                       |                                            |                                           |    |
|---------------------------------------------------|------------------------------------------------|-----------------------------------------|-------------------------------------------------------|--------------------------------------------|-------------------------------------------|----|
| <i>Veterinary</i>                                 | Ear tags per head                              | Number of<br>reared livestock<br>(head) | Total number<br>of ear tags<br>(piece)                | Price per ear<br>tag (USD)                 | Sum<br>(USD yr <sup>-1</sup> )            |    |
| Calve                                             |                                                | 2                                       | 14                                                    | 28                                         | 0,8                                       | 22 |
| Kids                                              |                                                | 1                                       | 32                                                    | 32                                         | 0,8                                       | 26 |
| Lambs                                             |                                                | 1                                       | 28                                                    | 28                                         | 0,8                                       | 22 |
| Sum of veterinary costs                           |                                                |                                         |                                                       |                                            | 70                                        |    |
| <i>Transport for beef trading</i>                 | Trips per year                                 | Average diesel<br>consumption<br>(L)    | Annual diesel<br>consumption<br>(L yr <sup>-1</sup> ) | Diesel price<br>(USD L <sup>-1</sup> )     |                                           |    |
|                                                   |                                                | 2                                       | 98                                                    | 196                                        | 0,5                                       | 98 |
| Sum of variable costs independent of water inflow |                                                |                                         |                                                       |                                            | 168                                       |    |
| Variable costs depending on water inflow          |                                                |                                         |                                                       |                                            |                                           |    |
| <i>Demand winter fodder (hay)</i>                 | Amount of hay<br>(kg d <sup>-1</sup> per head) | Livestock<br>number<br>(head)           | Feeding period<br>(d)                                 | Annual<br>amount<br>(kg yr <sup>-1</sup> ) | Total<br>demand<br>(kg yr <sup>-1</sup> ) |    |
| Cattle                                            | 10                                             | 57                                      | 148                                                   | 84360                                      | 123.728                                   |    |
| Goat                                              | 2                                              | 67                                      | 148                                                   | 19832                                      |                                           |    |
| Sheep                                             | 2                                              | 57                                      | 148                                                   | 16872                                      |                                           |    |
| Workhorses                                        | 9                                              | 2                                       | 148                                                   | 2664                                       |                                           |    |

| <i>Feed costs (hay for winter period)</i>                  | <i>Specification</i>               | <i>Total demand<br/>(kg yr<sup>-1</sup>)</i> | <i>Production or<br/>purchase price<br/>(USD kg<sup>-1</sup>)</i> | <i>Production or<br/>purchase costs<br/>(USD yr<sup>-1</sup>)</i> | <i>Sum<br/>(USD yr<sup>-1</sup>)</i> |
|------------------------------------------------------------|------------------------------------|----------------------------------------------|-------------------------------------------------------------------|-------------------------------------------------------------------|--------------------------------------|
| Normal situation                                           | Farm own production of<br>reed hay | 123728                                       | 0,03                                                              | 3712                                                              | <b>3.712</b>                         |
| Decreasing water inflow                                    | Farm own production of<br>reed hay | 61864                                        | 0,03                                                              | 1856                                                              | <b>8.042</b>                         |
|                                                            | Purchase of lucerne hay            | 61864                                        | 0,10                                                              | 6186                                                              |                                      |
| Worst case                                                 | Purchase of reed hay               | 61864                                        | 0,08                                                              | 4949                                                              | <b>13.610</b>                        |
|                                                            | Purchase of lucerne hay            | 61864                                        | 0,14                                                              | 8661                                                              |                                      |
| <b>Total variable costs, normal situation</b>              |                                    |                                              |                                                                   |                                                                   | <b>3.880</b>                         |
| <b>Total variable costs, decreasing water inflow</b>       |                                    |                                              |                                                                   |                                                                   | <b>8.211</b>                         |
| <b>Total variable costs, worst case</b>                    |                                    |                                              |                                                                   |                                                                   | <b>13.778</b>                        |
| <b>Contribution margin (USD yr<sup>-1</sup> per stock)</b> |                                    |                                              |                                                                   |                                                                   |                                      |
| <b>Normal situation</b>                                    |                                    |                                              |                                                                   |                                                                   | <b>12.941</b>                        |
| <b>Decreasing water inflow</b>                             |                                    |                                              |                                                                   |                                                                   | <b>8.611</b> 33,462067               |
| <b>Worst case</b>                                          |                                    |                                              |                                                                   |                                                                   | <b>3.043</b> 76,484724               |
| <b>Contribution margin ratio (%)</b>                       |                                    |                                              |                                                                   |                                                                   |                                      |
| <b>Normal situation</b>                                    |                                    |                                              |                                                                   |                                                                   | <b>77</b>                            |
| <b>Decreasing water inflow</b>                             |                                    |                                              |                                                                   |                                                                   | <b>51</b>                            |
| <b>Worst case</b>                                          |                                    |                                              |                                                                   |                                                                   | <b>18</b>                            |

#### **Fixed costs**

| <i>Labor</i>                | <i>Number of employees</i> | <i>Monthly salary<br/>(USD)</i> | <i>Months per year</i> | <i>Sum<br/>(USD yr<sup>-1</sup>)</i> |
|-----------------------------|----------------------------|---------------------------------|------------------------|--------------------------------------|
| Permanent employed shepherd | 1                          | 174                             | 12                     | 2088,0                               |

|                                    |                         |                                          |                        |                                                   |                                  |       |
|------------------------------------|-------------------------|------------------------------------------|------------------------|---------------------------------------------------|----------------------------------|-------|
| <i>Land</i>                        | Total area<br>(ha)      | Leasing price<br>(USD yr <sup>-1</sup> ) |                        |                                                   |                                  |       |
|                                    | 443                     | 0,29                                     |                        |                                                   |                                  | 129   |
| <i>Farm buildings</i>              | Material costs<br>(USD) | Useful life<br>(years)                   | Salvage value<br>(USD) | Annual<br>depreciation<br>(USD yr <sup>-1</sup> ) |                                  |       |
| Wood stable including hay storage  | 1716                    | 49                                       | 0                      | 35                                                |                                  | 35    |
| House for employees                | 2112                    | 49                                       | 0                      | 43                                                |                                  | 43    |
|                                    |                         |                                          |                        | Sum of building costs                             |                                  | 78,1  |
| <i>Farm vehicles and machinery</i> | Purchase price<br>(USD) | Useful life<br>(years)                   | Salvage value<br>(USD) | Annual<br>depreciation<br>(USD yr <sup>-1</sup> ) | Taxes<br>(USD yr <sup>-1</sup> ) |       |
| Used car (mainly private use)      | 2425                    | 6                                        | 0                      | 404                                               | 34                               | 438   |
| Used tractor                       | 4900                    | 6                                        | 0                      | 817                                               | 40                               | 857   |
| Used trailer                       | 1000                    | 6                                        | 0                      | 167                                               | 0                                | 167   |
| Used mower                         | 1000                    | 6                                        | 0                      | 167                                               | 0                                | 167   |
|                                    |                         |                                          |                        | Sum of machinery costs                            |                                  | 1628  |
|                                    |                         |                                          |                        | Total fixed costs                                 |                                  | 3923  |
| <hr/>                              |                         |                                          |                        |                                                   |                                  |       |
|                                    |                         |                                          |                        | Net farm income (USD yr <sup>-1</sup> per stock)  |                                  |       |
|                                    |                         |                                          |                        | Normal situation                                  |                                  | 9.018 |
|                                    |                         |                                          |                        | Decreasing water inflow                           |                                  | 4.688 |
|                                    |                         |                                          |                        | Worst case                                        |                                  | -880  |
