# Supplementary material
Source: MDPI journal article supplement (https://www.mdpi.com/2077-0472/10/7/281)
Supplement: s1 [file s1]

**Table S3.** Breeding and rearing performance (averages) of the three types of individual farms.

|                               | Unit        | Small-scale | Medium-scale | Large-scale |
|-------------------------------|-------------|-------------|--------------|-------------|
| Total number of cattle        | head        | 21          | 57           | 140         |
| Share of cows                 | %           | 74          | 83           | 86          |
| Number of cows                | head        | 16          | 47           | 120         |
| Calving rate                  | %           | 75          | 66           | 90          |
| Number of calves              | head        | 12          | 31           | 108         |
| Rearing rate of calves        | %           | 60          | 46           | 63          |
| Number of reared calves       | head        | 7           | 14           | 68          |
| <b>Number of bull calves</b>  | <b>head</b> | <b>4</b>    | <b>7</b>     | <b>34</b>   |
| <b>Number of cow calves</b>   | <b>head</b> | <b>3</b>    | <b>7</b>     | <b>34</b>   |
| Total number of goats         | head        | 38          | 67           |             |
| Share of nanny goats          | %           | 95          | 85           |             |
| Number of nanny goats         | head        | 36          | 57           |             |
| Kidding rate                  | %           | 72          | 76           |             |
| Number of kids                | head        | 26          | 43           |             |
| Rearing rate of kids          | %           | 50          | 74           |             |
| <b>Number of reared kids</b>  | <b>head</b> | <b>13</b>   | <b>32</b>    |             |
| Total number of sheep         | head        | 36          | 57           |             |
| Share of ewes                 | %           | 90          | 83           |             |
| Number of ewes                | head        | 32          | 47           |             |
| Lambing rate                  | %           | 49          | 85           |             |
| Number of lambs               | head        | 16          | 40           |             |
| Rearing rate of lambs         | %           | 32          | 70           |             |
| <b>Number of reared lambs</b> | <b>head</b> | <b>5</b>    | <b>28</b>    |             |
