# Supplementary material
Source: MDPI journal article supplement (https://www.mdpi.com/2077-0472/10/7/281)
Supplement: s1 [file s1]

**Table S4.** Contribution margin analysis and net farm incomes from operations, small-scale individual farm.

| Small-scale farm                |                                                       |                                         |                                       |                                         |                             |                                        |
|---------------------------------|-------------------------------------------------------|-----------------------------------------|---------------------------------------|-----------------------------------------|-----------------------------|----------------------------------------|
| <b>Revenues</b>                 |                                                       |                                         |                                       |                                         |                             |                                        |
| <i>Cash revenue</i>             | Number of traded livestock (head)                     | Weight of meat (kg head <sup>-1</sup> ) | Selling price (USD kg <sup>-1</sup> ) | Selling price (USD head <sup>-1</sup> ) | Sum (USD yr <sup>-1</sup> ) | percentage share of total revenues (%) |
| Sale of beef                    | 4                                                     | 81                                      | 5,1                                   |                                         | 1.652                       |                                        |
| Sale of goat (head)             | 8                                                     |                                         |                                       | 92,4                                    | 739                         |                                        |
| Sale of sheep (head)            | 2                                                     |                                         |                                       | 158,4                                   | 317                         |                                        |
|                                 |                                                       |                                         |                                       | <b>Sum of cash revenues</b>             | <b>2.708</b>                | <b>50</b>                              |
| <i>Value of own consumption</i> | Number of consumed livestock (head yr <sup>-1</sup> ) | Weight of meat (kg head <sup>-1</sup> ) | Selling price (USD kg <sup>-1</sup> ) | Selling price (USD head <sup>-1</sup> ) |                             | percentage share of total revenues (%) |
| Consumption of beef             | 1                                                     | 159                                     | 5,1                                   |                                         | 811                         |                                        |
| Consumption of goat meat        | 5                                                     |                                         |                                       | 92,4                                    | 462                         |                                        |
| Consumption of sheep meat       | 3                                                     |                                         |                                       | 158,4                                   | 475                         |                                        |
|                                 |                                                       |                                         |                                       | <b>Sum of value of own consumption</b>  | <b>1.748</b>                | <b>32</b>                              |
| <i>Inventory changes</i>        | Herd size at end of the year (head)                   | Additional cow calves (head)            |                                       | Selling price (USD head <sup>-1</sup> ) |                             | percentage share of total revenues (%) |
| Cattle                          | 23                                                    | 2                                       |                                       | 502                                     | 1.004                       |                                        |
|                                 |                                                       |                                         |                                       | <b>Sum of inventory changes</b>         | <b>1.004</b>                | <b>18</b>                              |
|                                 |                                                       |                                         |                                       | <b>Total revenues</b>                   | <b>5.460</b>                | <b>100</b>                             |

---

**Variable costs independent of water inflow**

| <i>Veterinary</i>                                 | Ear tags per head       | Number of<br>reared livestock<br>(head) | Total number of<br>ear tags<br>(piece)                | Price per ear<br>tag (USD)             | Sum<br>(USD yr <sup>-1</sup> ) |
|---------------------------------------------------|-------------------------|-----------------------------------------|-------------------------------------------------------|----------------------------------------|--------------------------------|
| Calve                                             | 2                       | 7                                       | 14                                                    | 0,8                                    | 11                             |
| Kids                                              | 1                       | 13                                      | 13                                                    | 0,8                                    | 10                             |
| Lambs                                             | 1                       | 5                                       | 5                                                     | 0,8                                    | 4                              |
| Sum of veterinary costs                           |                         |                                         |                                                       |                                        | 26                             |
| <i>Transport for stock control</i>                | Stock controls per year | Average diesel<br>consumption<br>(L)    | Annual diesel<br>consumption<br>(L yr <sup>-1</sup> ) | Diesel price<br>(USD L <sup>-1</sup> ) |                                |
|                                                   | 104                     | 15                                      | 1.560                                                 | 0,5                                    | 780                            |
| Sum of variable costs independent of water inflow |                         |                                         |                                                       |                                        | 806                            |

**Variable costs depending on water inflow**

| <i>Demand winter fodder (hay)</i>         | Amount of hay<br>(kg d <sup>-1</sup> per head) | Livestock<br>number<br>(head)          | Feeding period<br>(d)                                      | Annual<br>amount<br>(kg yr <sup>-1</sup> )                 | Total<br>demand<br>(kg yr <sup>-1</sup> ) |
|-------------------------------------------|------------------------------------------------|----------------------------------------|------------------------------------------------------------|------------------------------------------------------------|-------------------------------------------|
| Cattle                                    |                                                | 10                                     | 21                                                         | 120                                                        | 25.200                                    |
| Goat                                      |                                                | 2                                      | 38                                                         | 120                                                        | 9.120                                     |
| Sheep                                     |                                                | 2                                      | 36                                                         | 120                                                        | 8.640                                     |
| <i>Feed costs (hay for winter period)</i> | Specification                                  | Total demand<br>(kg yr <sup>-1</sup> ) | Production or<br>purchase price<br>(USD kg <sup>-1</sup> ) | Production or<br>purchase costs<br>(USD yr <sup>-1</sup> ) | Sum<br>(USD yr <sup>-1</sup> )            |

|                                                      |                                 |                                       |      |                             |                 |
|------------------------------------------------------|---------------------------------|---------------------------------------|------|-----------------------------|-----------------|
| Normal situation                                     | Farm own production of reed hay | 42.960,00                             | 0,02 | 859                         | 859             |
| Decreasing water inflow                              | Farm own production of reed hay | 21.480,00                             | 0,02 | 430                         | 2.578           |
|                                                      | Purchase of lucerne hay         | 21.480,00                             | 0,10 | 2.148                       |                 |
| Worst case                                           | Purchase of reed hay            | 21.480,00                             | 0,08 | 1.718                       | 4.726           |
|                                                      | Purchase of lucerne hay         | 21.480,00                             | 0,14 | 3.007                       |                 |
| Total variable costs, normal situation               |                                 |                                       |      |                             | 1.665           |
| Total variable costs, decreasing water inflow        |                                 |                                       |      |                             | 3.383           |
| Total variable costs, worst case                     |                                 |                                       |      |                             | 5.531           |
| Contribution margin (USD yr <sup>-1</sup> per stock) |                                 |                                       |      |                             |                 |
| Normal situation                                     |                                 |                                       |      |                             | 3.795           |
| Decreasing water inflow                              |                                 |                                       |      |                             | 2.077 45,272727 |
| Worst case                                           |                                 |                                       |      |                             | -71 101,87352   |
| Contribution margin ratio (%)                        |                                 |                                       |      |                             |                 |
| Normal situation                                     |                                 |                                       |      |                             | 70              |
| Decreasing water inflow                              |                                 |                                       |      |                             | 38              |
| Worst case                                           |                                 |                                       |      |                             | -1              |
| Fixed costs                                          |                                 |                                       |      |                             |                 |
| <i>Land</i>                                          | Total area (ha)                 | Leasing price (USD yr <sup>-1</sup> ) |      | Sum (USD yr <sup>-1</sup> ) |                 |
|                                                      |                                 | 334                                   | 0,29 | 97                          |                 |

| <i>Farm buildings</i>                            | Material costs<br>(USD) | Useful life<br>(years) | Salvage value<br>(USD) | Annual<br>depreciation<br>(USD yr <sup>-1</sup> ) |                                  |       |
|--------------------------------------------------|-------------------------|------------------------|------------------------|---------------------------------------------------|----------------------------------|-------|
| Wood stable including hay storage                | 713                     | 49                     | 0                      | 15                                                |                                  | 15    |
| <i>Farm vehicle</i>                              | Purchase price<br>(USD) | Useful life<br>(years) | Salvage value<br>(USD) | Annual<br>depreciation<br>(USD yr <sup>-1</sup> ) | Taxes<br>(USD yr <sup>-1</sup> ) |       |
| Used car (also private use)                      | 2425                    | 6                      | 0                      | 404                                               | 34                               | 438   |
| Total fixed costs                                |                         |                        |                        |                                                   |                                  | 550   |
| Net farm income (USD yr <sup>-1</sup> per stock) |                         |                        |                        |                                                   |                                  |       |
| Normal situation                                 |                         |                        |                        |                                                   |                                  | 3.245 |
| Decreasing water inflow                          |                         |                        |                        |                                                   |                                  | 1.527 |
| Worst case                                       |                         |                        |                        |                                                   |                                  | -621  |
